# Supplementary material for: Effect of 5-HT7receptor blockade on liver regeneration after 60-70% partial hepatectomy
Source: Springer Nature journal article supplement (doi:10.1186/s12876-014-0201-2), 2014-11-29
Supplement: MOESM14 [file 9738030]

**Table 3: Liver and serum triacylglycerol levels and serum glycerol and FFA levels in groups E, F and G.**

| Time after PH (hours) | **GROUP E** | | | | **GROUP F** | | | | **GROUP G** | | | |
| --- | --- | --- | --- | --- | --- | --- | --- | --- | --- | --- | --- | --- |
| Liver triacylglycerol  (μg/mg of protein) | Serum triacylglycerol (mg/dl) | Serum  glycerol (μmol/l) | Serum FFA  (μmol/ml or mmol/l) | Liver triacylglycerol (μg/mg of protein | Serum triacylglycerol (mg/dl) | Serum glycerol (μmol/l) | Serum FFA (μmol/ml or mmol/l) | Liver triacylglycerol  (μg/mg of protein) | Serum triacylglycerol (mg/dl) | Serum glycerol (μmol/l) | Serum FFA (μmol/ml or mmol/l) |
| 0 | 15.8±0.8 | 6.2±0.6 | 61.2±5.2 | 0.32±0.05 | 15.8±0.8 | 6.2±0.6 | 61.2±5.2 | 0.32±0.05 | 15.8±0.8 | 6.2±0.6 | 61.2±5.2 | 0.32±0.05 |
| 18 | 30.3±2.9 | 4.0±0.6 | 180.7±8.3 | 0.85±0.09 | 28.9±3.3 | 3.8±0.5 | 175.9±8.5 | 0.72±0.08 | 29.9±2.8 | 4.2±0.8 | 184.8±8.8 | 0.81±0.08 |
| 20 | 32.7±3.8 | 3.7±0.5 | 191.3±8.9 | 0.83±0.06 | 30.8±3.5 | 3.9±0.5 | 190.7±9.0 | 0.79±0.09 | 34.3±3.1 | 3.6±0.7 | 196.7±8.5 | 0.77±0.08 |
| 24 | 35.7±3.9 | 3.5±0.5 | 194.5±9.7 | 0.80±0.07 | 34.4±3.8 | 3.4±0.7 | 193.8±8.5 | 0.87±0.13 | 37.2±3.5 | 3.1±0.6 | 199.5±9.2 | 0.79±0.07 |
| 32 | 39.5±3.3 | 5.0±0.9 | 201.6±10.3 | 0.93±0.11 | 42.3±4.0 | 5.3±0.9 | 198.5±9.9 | 0.96±0.15 | 38.8±3.7 | 4.5±0.9 | 207.8±10.4 | 0.90±0.09 |
| 40 | 42.6±4.1 | 6.7±0.6 | 199.2±10.8 | 0.86±0.09 | 44.6±4.6 | 6.3±1.1 | 205.6±10.7 | 0.91±0.09 | 43.4±3.6 | 6.1±0.9 | 210.9±9.5 | 0.95±0.09 |
| 48 | 35.9±2.9 | 7.7±0.8 | 206.7±11.3 | 0.83±0.08 | 37.5±3.9 | 7.6±0.9 | 203.7±10.2 | 0.87±0.08 | 32.9±3.5 | 7.2±1.2 | 200.3±10.7 | 0.81±0.08 |
| 60 | 27.4±2.6 | 7.1±0.9 | 182.9±9.6 | 0.81±0.08 | 29.8±3.3 | 7.4±0.9 | 185.8±8.8 | 0.82±0.07 | 26.3±2.4 | 7.3±0.9 | 172.7±8.9 | 0.73±0.07 |
| 72 | 23.6±2.2 | 6.7±0.6 | 200.4±9.9 | 0.85±0.09 | 25.6±2.9 | 6.5±0.8 | 203.6±9.5 | 0.76±0.09 | 21.8±1.9 | 7.0±1.0 | 192.6±7.5 | 0.81±0.09 |

Values are expressed as mean ± standard error

FFA = Free fatty acid
